# Supplementary material for: The Putative S1PR1 Modulator ACT-209905 Impairs Growth and Migration of Glioblastoma Cells In Vitro
Source: Cancers (Basel). 2023 Aug 26;15(17):4273. doi: 10.3390/cancers15174273 (PMC10486705; doi:10.3390/cancers15174273)
Supplement: Supplementary file 1 [file cancers-15-04273-s001.zip › Supplementery File S1.pdf]

Uncropped Blots from those shown  
in Figure 1a and 1b

*Article*

Modulation of Sphingosine-1-phosphate receptor 1 by ACT-209905 impairs growth and migration of Glioblastoma cells *in vitro*

Sandra Bien-Möller<sup>1</sup>, Fan Chen<sup>2</sup>, Yong Xiao<sup>3</sup>, Sascha Marx<sup>4</sup>, Celine Tolksdorf<sup>5</sup>, Ulrike Meyer<sup>6</sup>, Mladen V. Tzvetkov<sup>7</sup>, Henry W. S. Schroeder<sup>8</sup>, Bernhard H. Rauch<sup>9\*</sup>

**S1PR1 in different GBM cell lines and THP-1 cells**

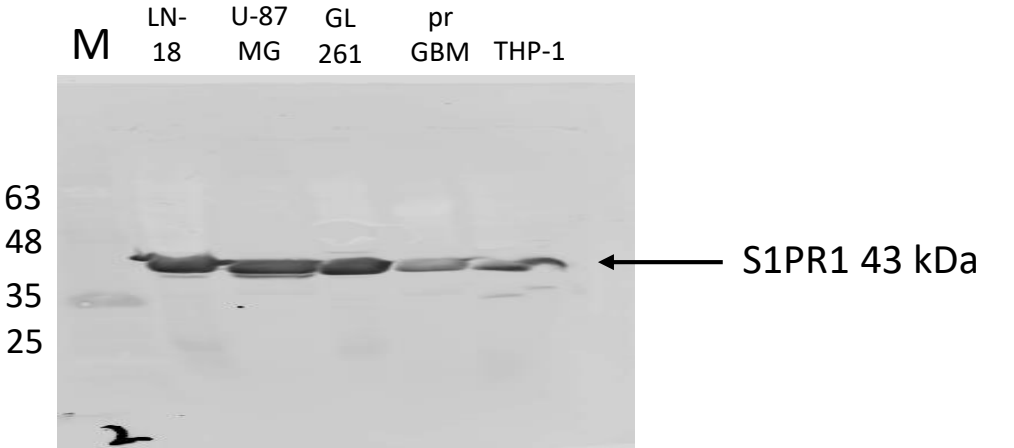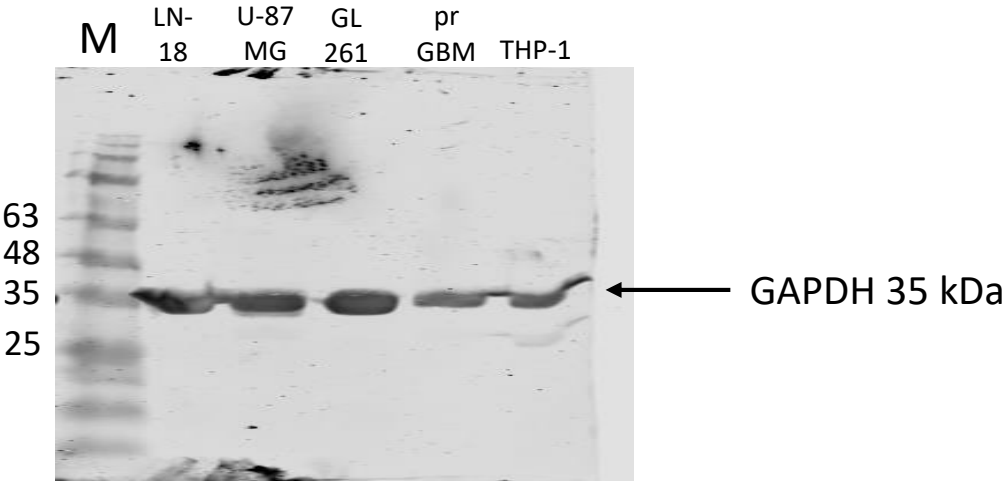

## CD133, Nestin and GFAP in prGBM cells

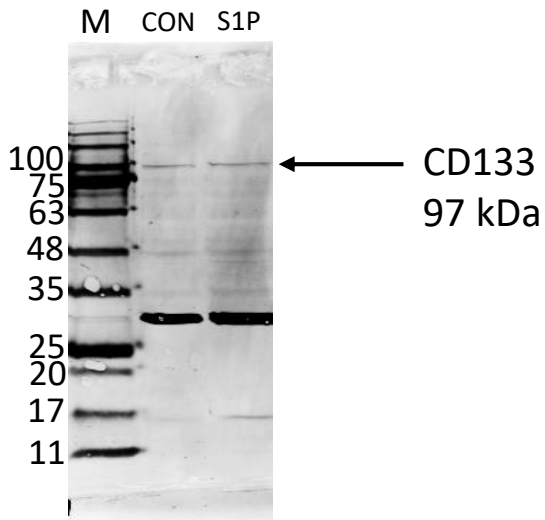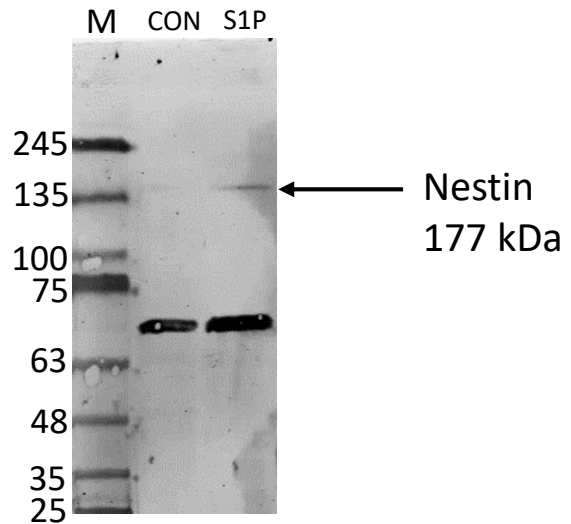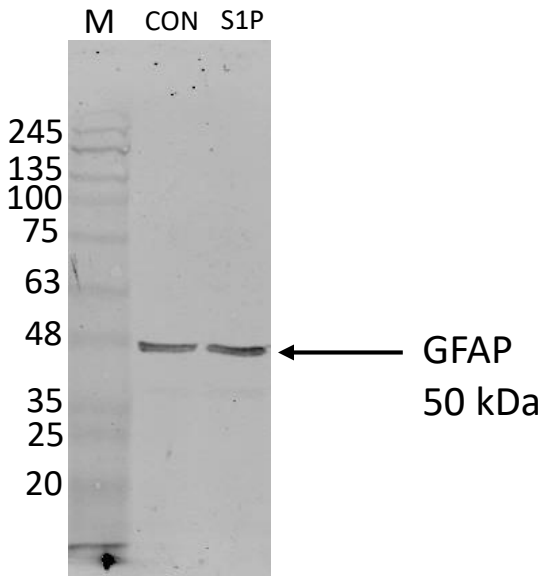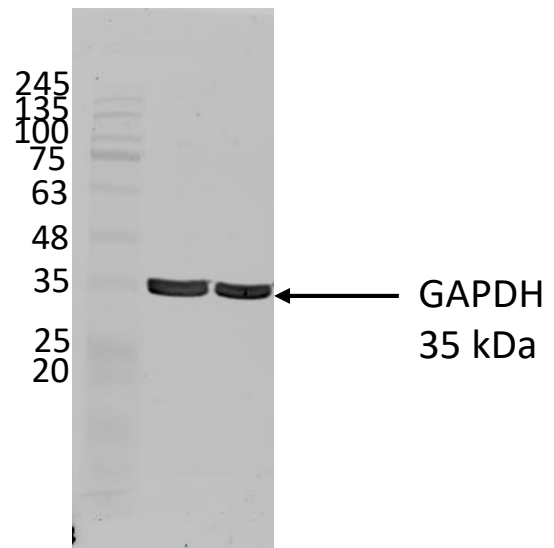

# Uncropped Blots from those shown in Figure 6

## *Article*

Modulation of Sphingosine-1-phosphate receptor 1 by ACT-209905 impairs growth and migration of Glioblastoma cells *in vitro*

Sandra Bien-Möller<sup>1</sup>, Fan Chen<sup>2</sup>, Yong Xiao<sup>3</sup>, Sascha Marx<sup>4</sup>, Celine Tolksdorf<sup>5</sup>, Ulrike Meyer<sup>6</sup>, Mladen V. Tzvetkov<sup>7</sup>, Henry W. S. Schroeder<sup>8</sup>, Bernhard H. Rauch<sup>9\*</sup>

## prGBM + THP-1 cells: PCNA

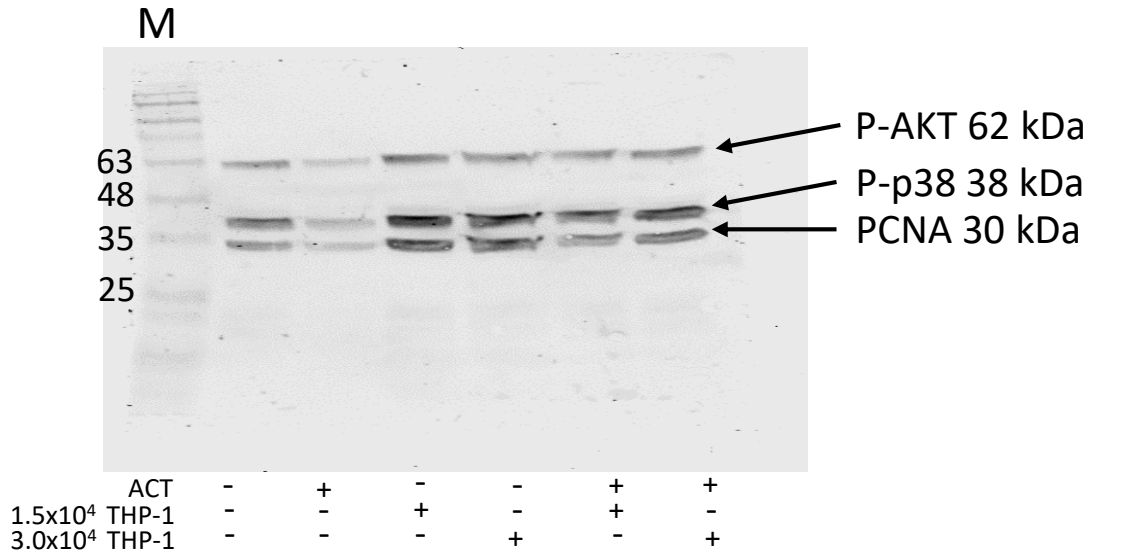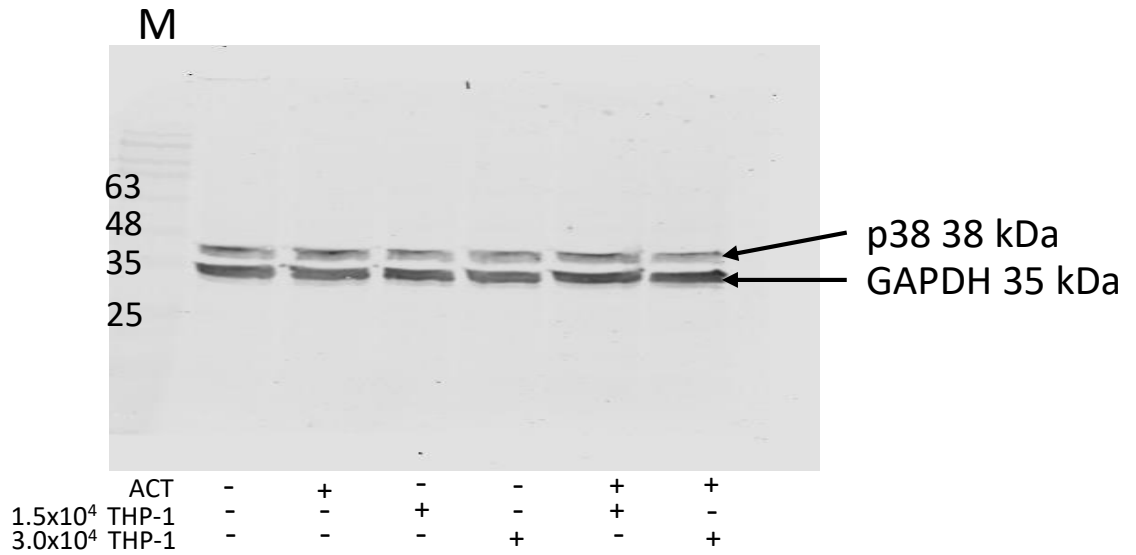

## prGBM + THP-1 cells: p38

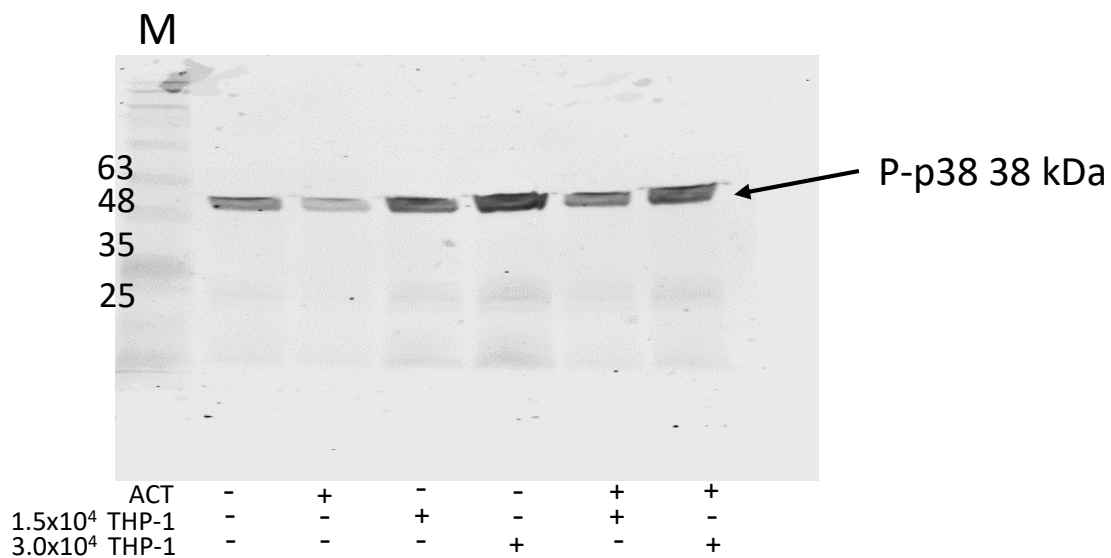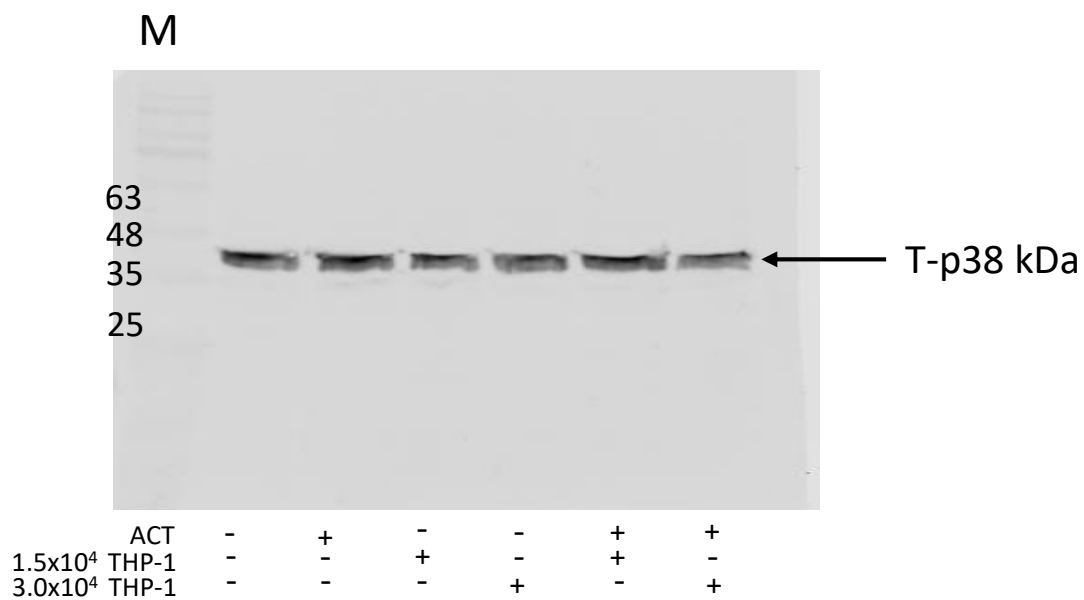

## prGBM + THP-1 cells: AKT

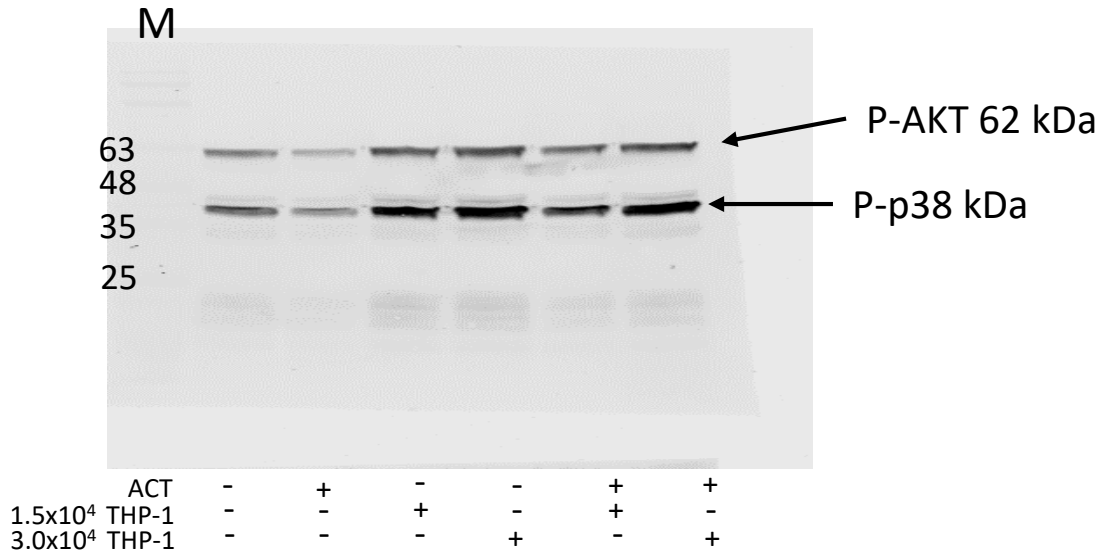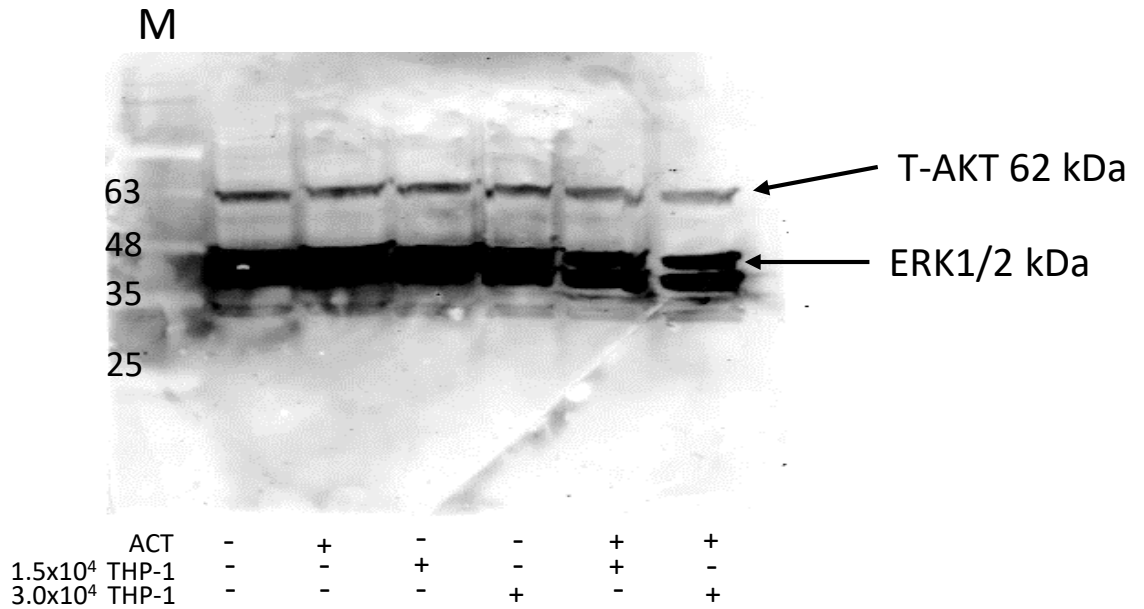

## prGBM + THP-1 cells: ERK1/2

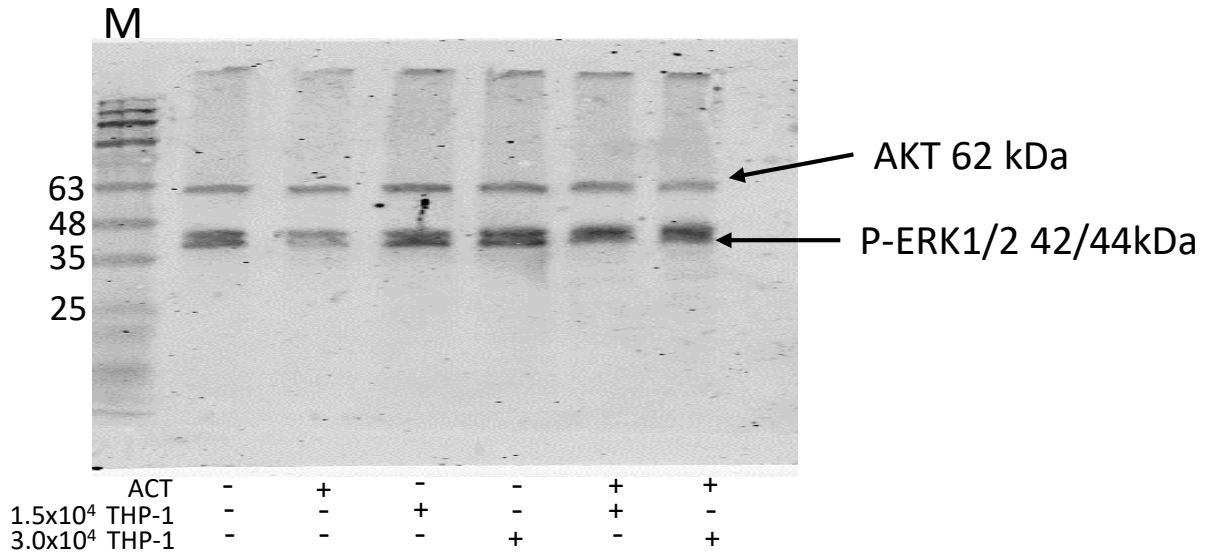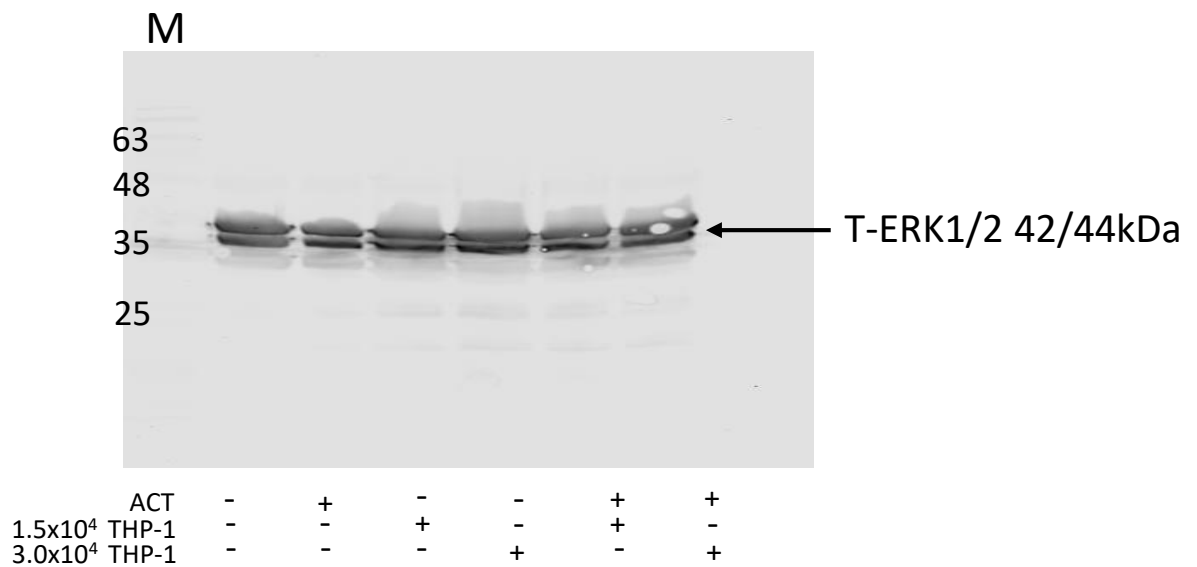

# prGBM + THP-1 conditioned medium: PCNA

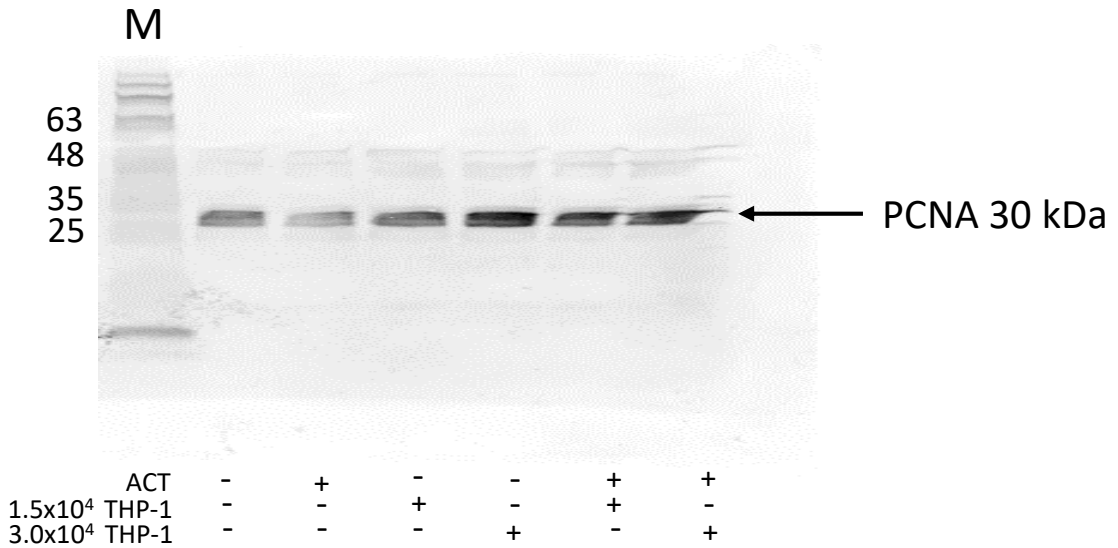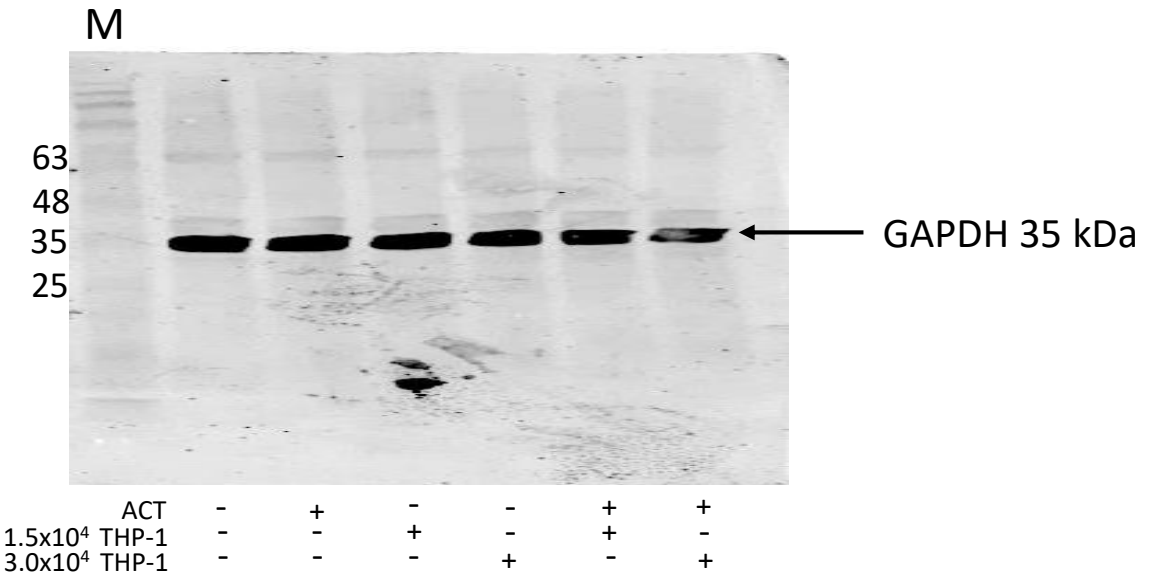

**prGBM + THP-1 conditioned medium: p38**

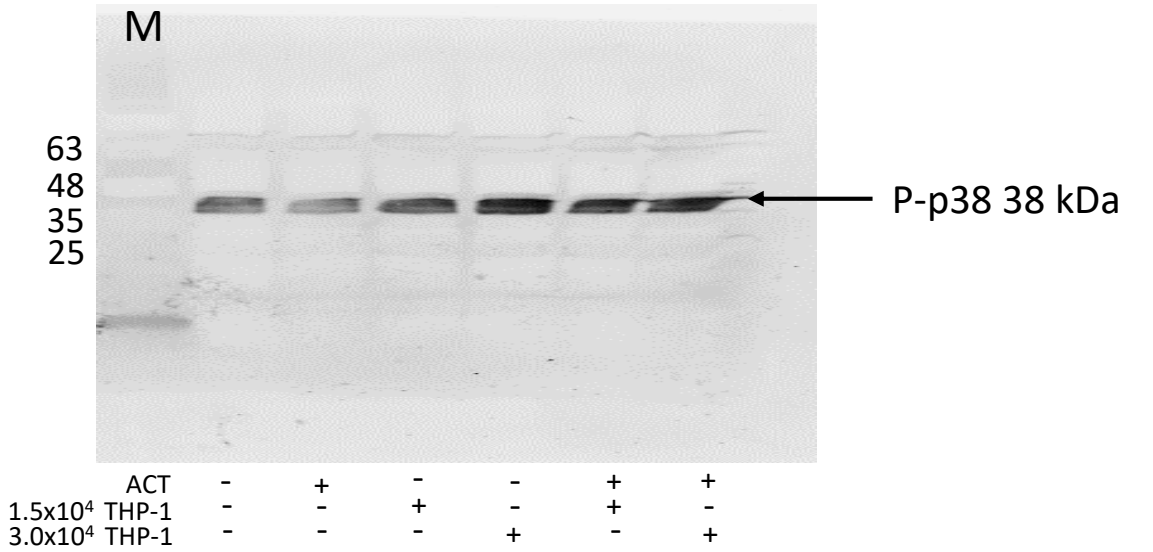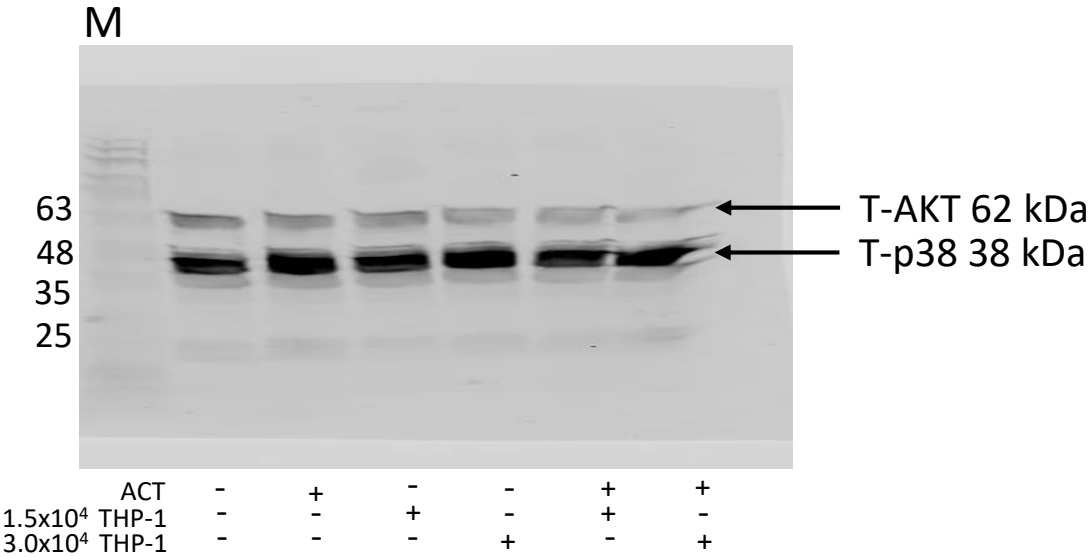

**prGBM + THP-1 conditioned medium: AKT**

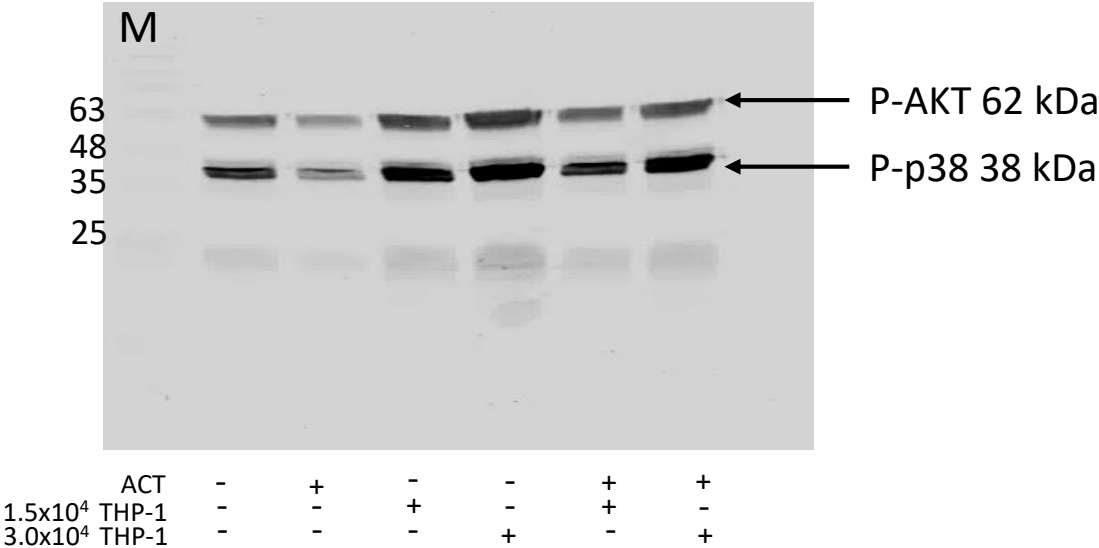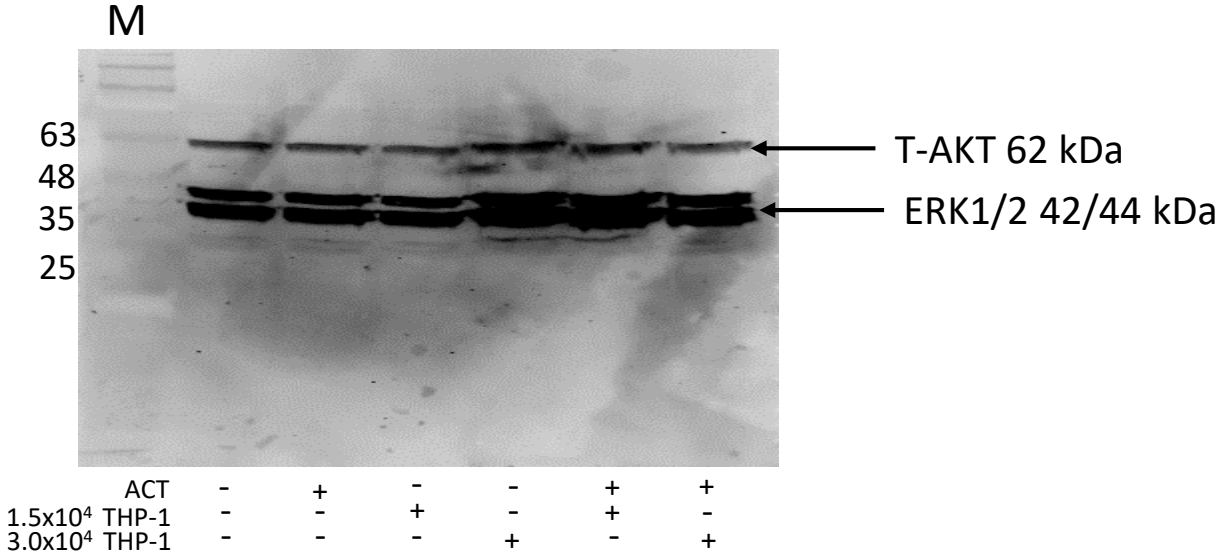

**prGBM + THP-1 conditioned medium: ERK1/2**

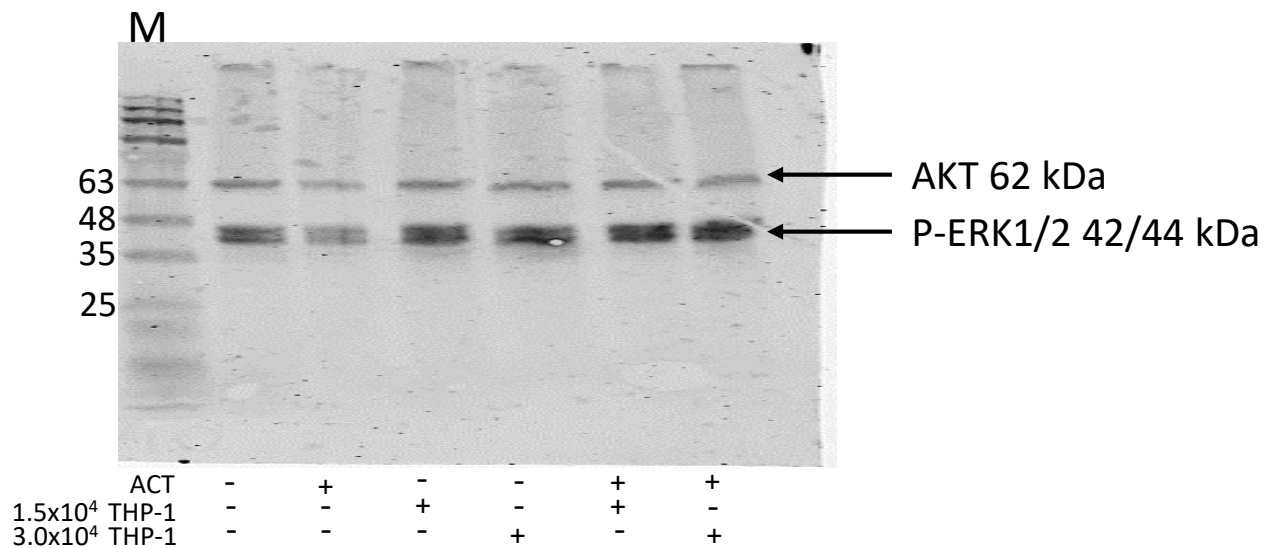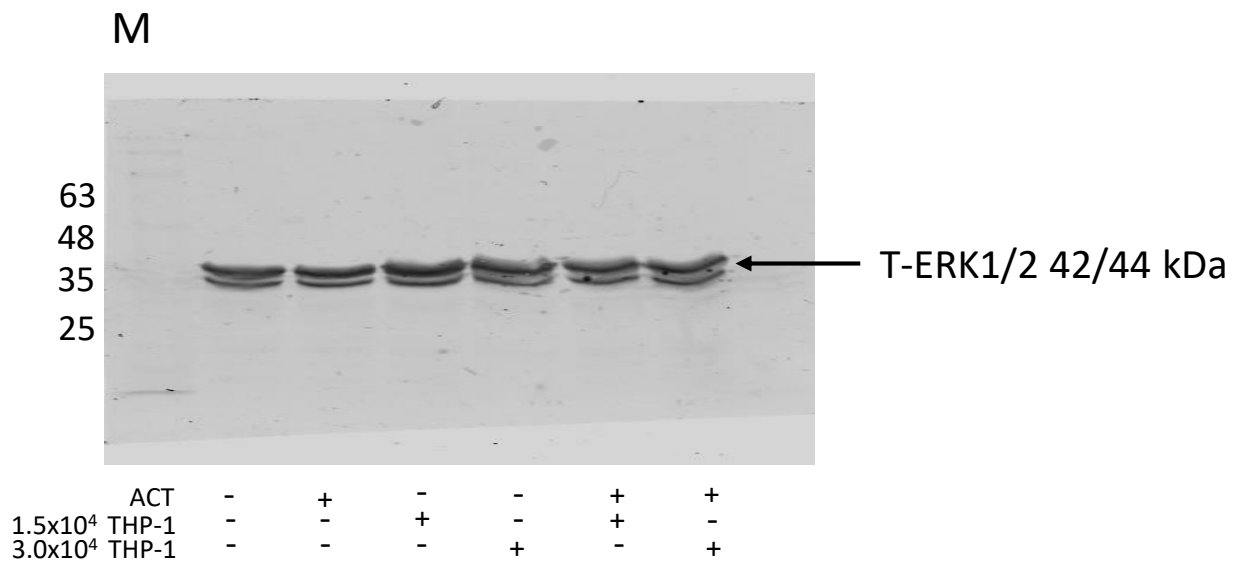

## GL261 + THP-1 cells: PCNA

M

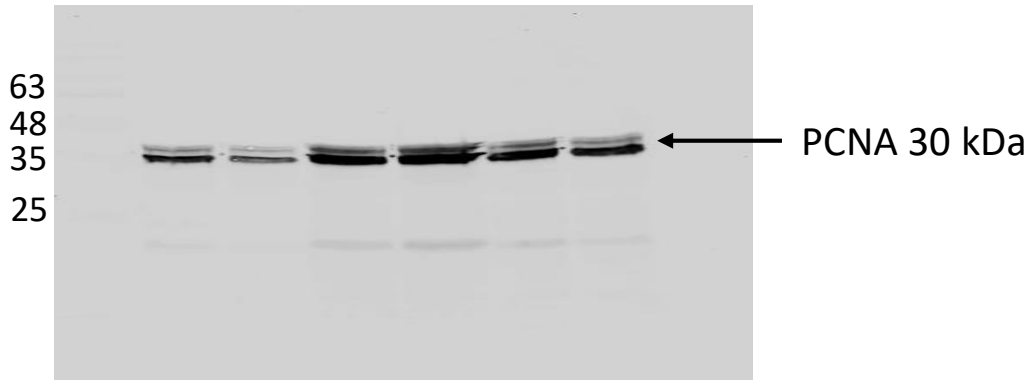

|                         |   |   |   |   |   |   |
|-------------------------|---|---|---|---|---|---|
| ACT                     | - | + | - | - | + | + |
| $1.5 \times 10^4$ THP-1 | - | - | + | - | + | - |
| $3.0 \times 10^4$ THP-1 | - | - | - | + | - | + |

M

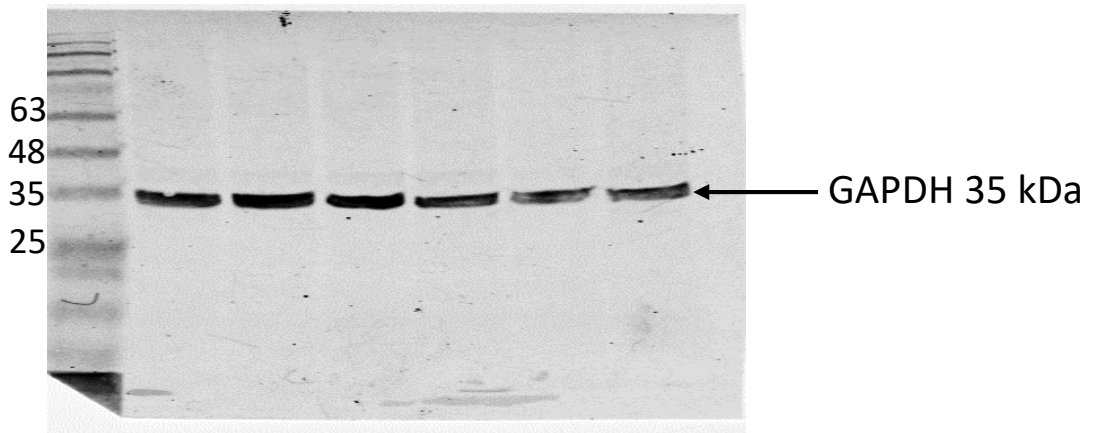

|                         |   |   |   |   |   |   |
|-------------------------|---|---|---|---|---|---|
| ACT                     | - | + | - | - | + | + |
| $1.5 \times 10^4$ THP-1 | - | - | + | - | + | - |
| $3.0 \times 10^4$ THP-1 | - | - | - | + | - | + |

## GL261 + THP-1 cells: p38

M

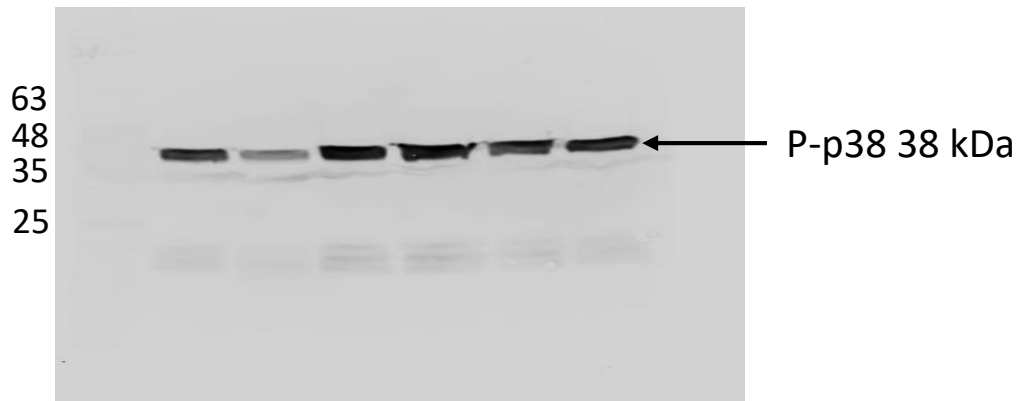

|                         |   |   |   |   |   |   |
|-------------------------|---|---|---|---|---|---|
| ACT                     | - | + | - | - | + | + |
| $1.5 \times 10^4$ THP-1 | - | - | + | - | + | - |
| $3.0 \times 10^4$ THP-1 | - | - | - | + | - | + |

M

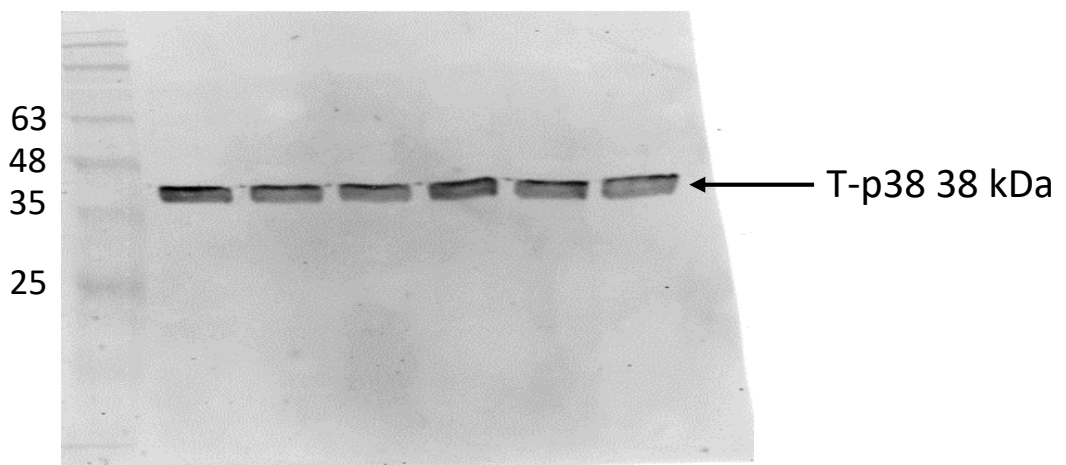

|                         |   |   |   |   |   |   |
|-------------------------|---|---|---|---|---|---|
| ACT                     | - | + | - | - | + | + |
| $1.5 \times 10^4$ THP-1 | - | - | + | - | + | - |
| $3.0 \times 10^4$ THP-1 | - | - | - | + | - | + |

## GL261 + THP-1 cells: AKT

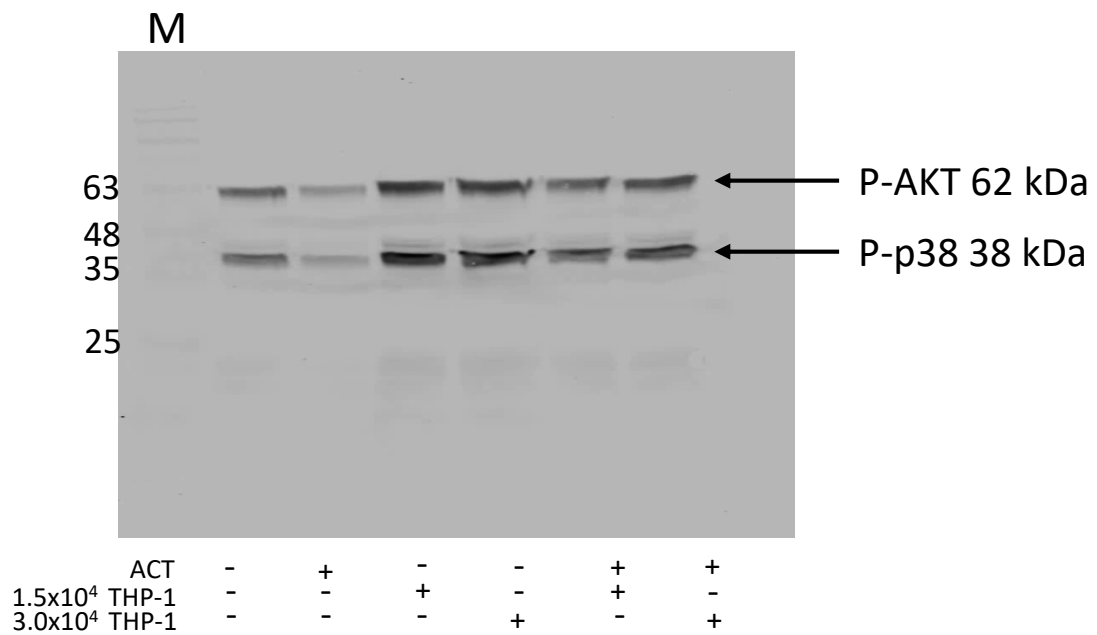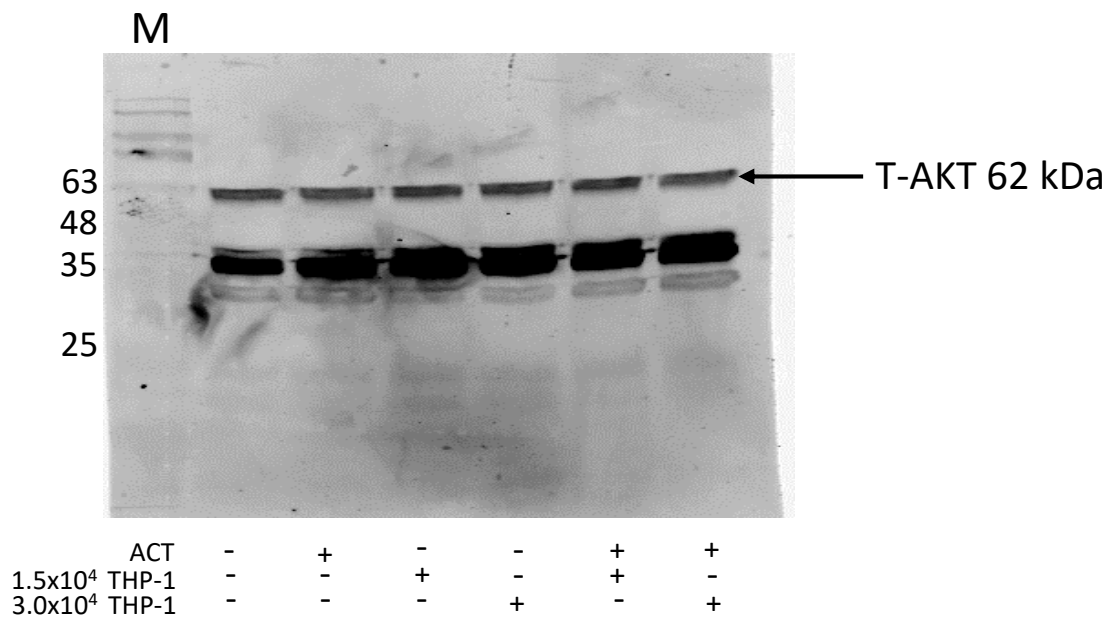

## GL261 + THP-1 cells: ERK1/2

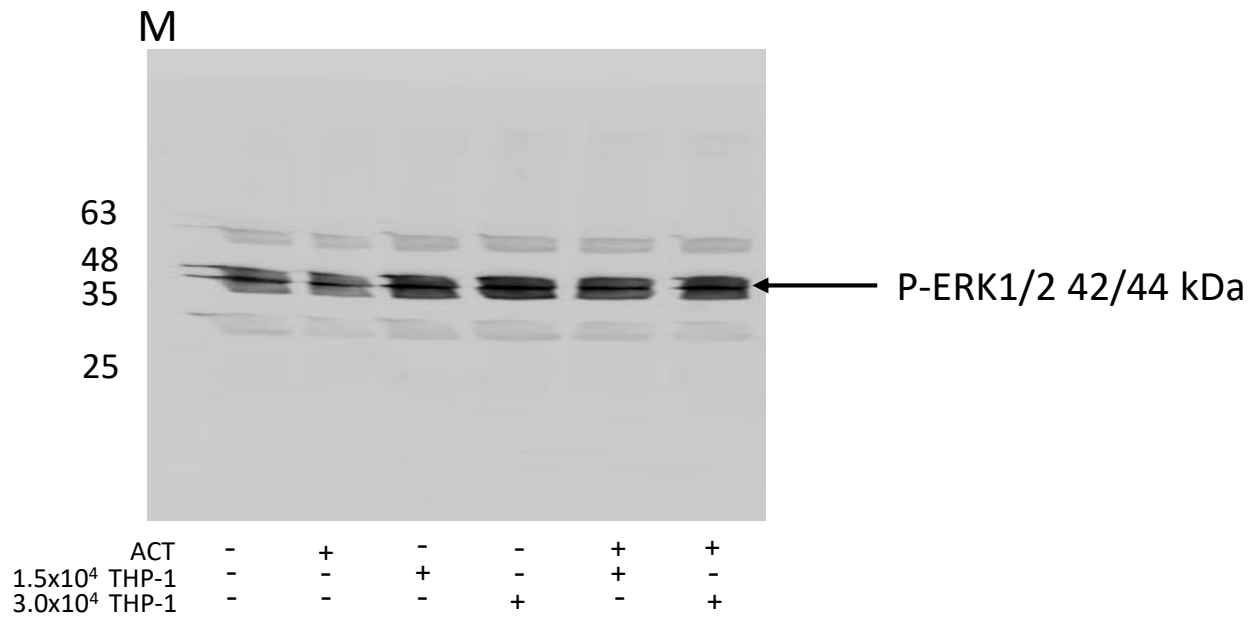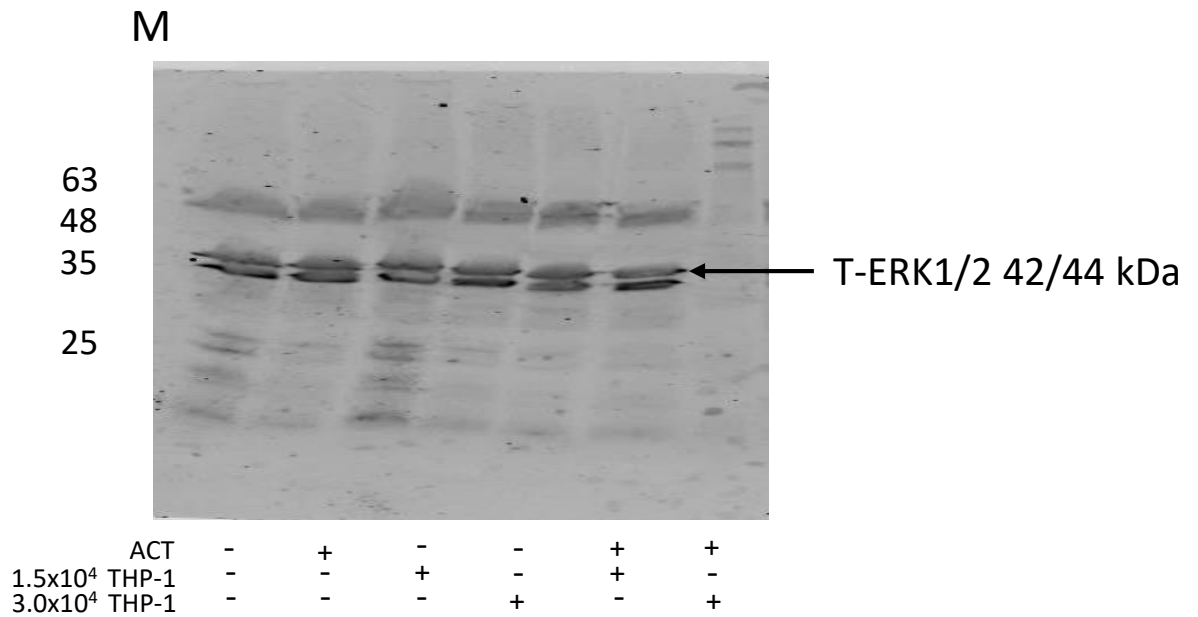

## GL261 + THP-1 conditioned medium: PCNA

M

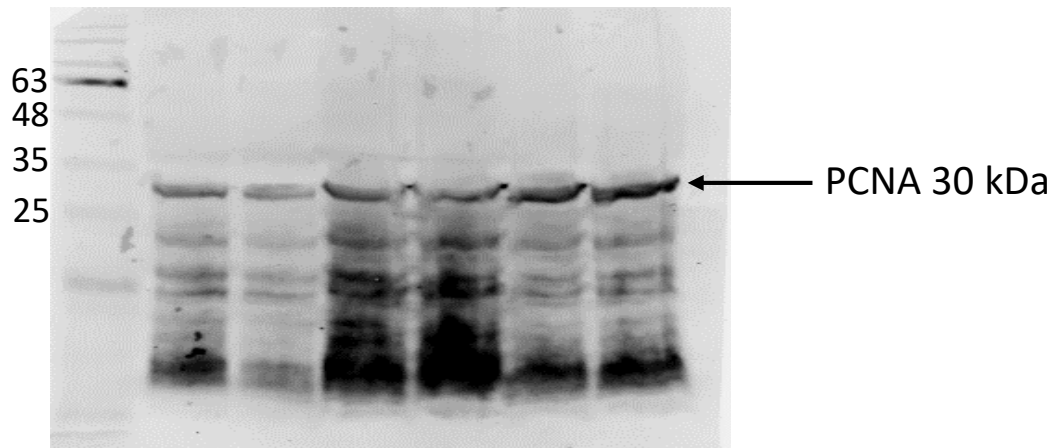

|                         |   |   |   |   |   |   |
|-------------------------|---|---|---|---|---|---|
| ACT                     | - | + | - | - | + | + |
| $1.5 \times 10^4$ THP-1 | - | - | + | - | + | - |
| $3.0 \times 10^4$ THP-1 | - | - | - | + | - | + |

M

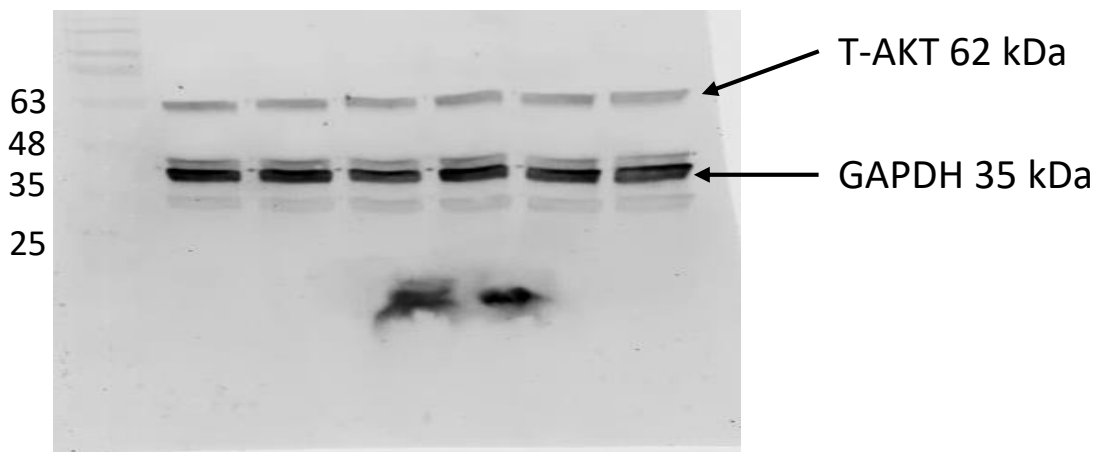

|                         |   |   |   |   |   |   |
|-------------------------|---|---|---|---|---|---|
| ACT                     | - | + | - | - | + | + |
| $1.5 \times 10^4$ THP-1 | - | - | + | - | + | - |
| $3.0 \times 10^4$ THP-1 | - | - | - | + | - | + |

## GL261 + THP-1 conditioned medium: p38

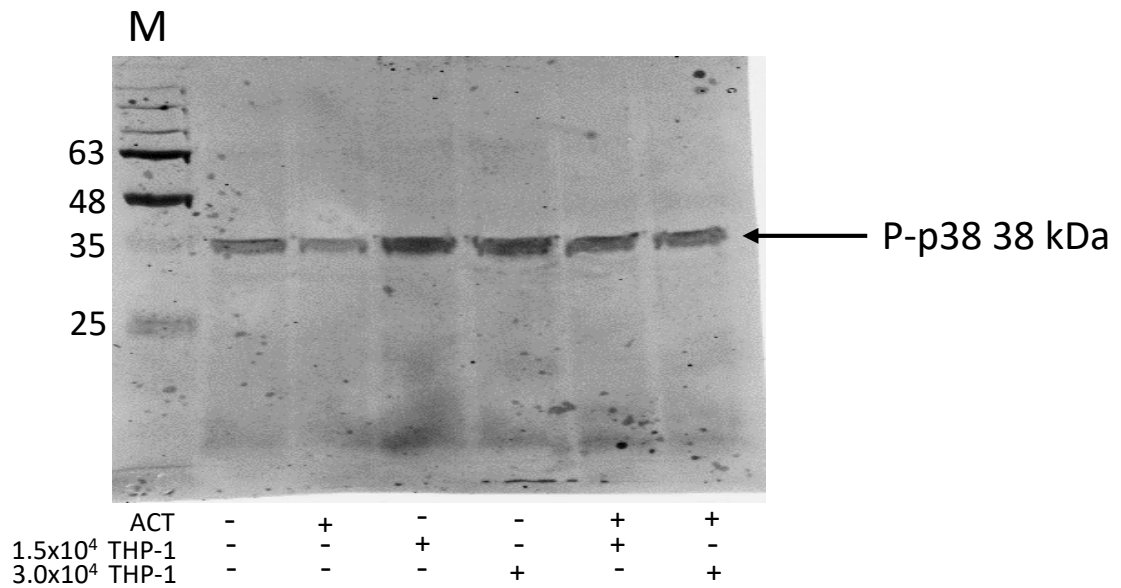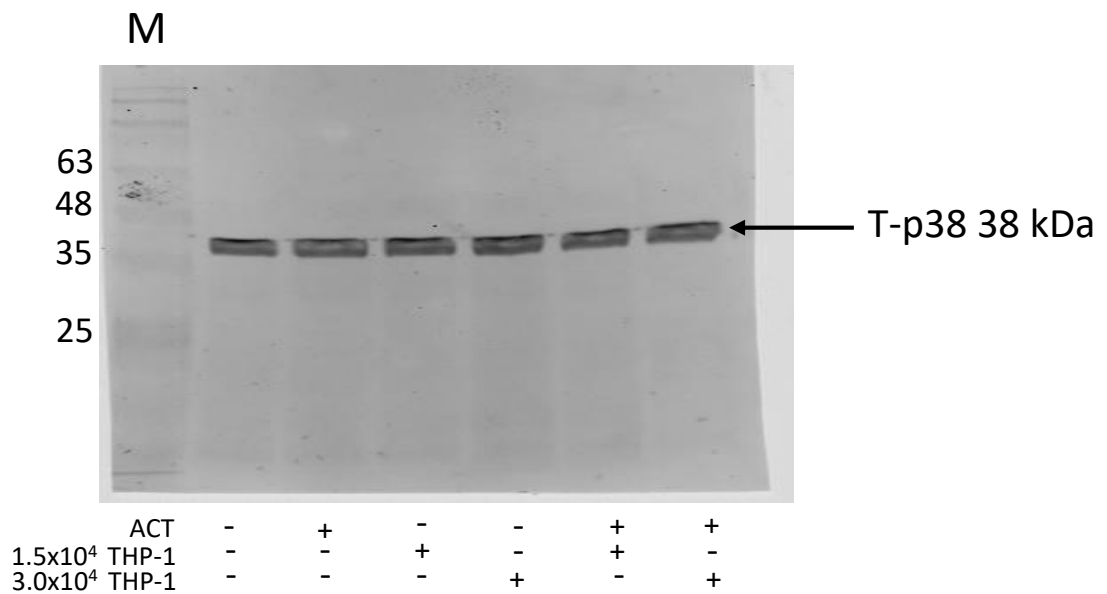

## GL261 + THP-1 conditioned medium: AKT

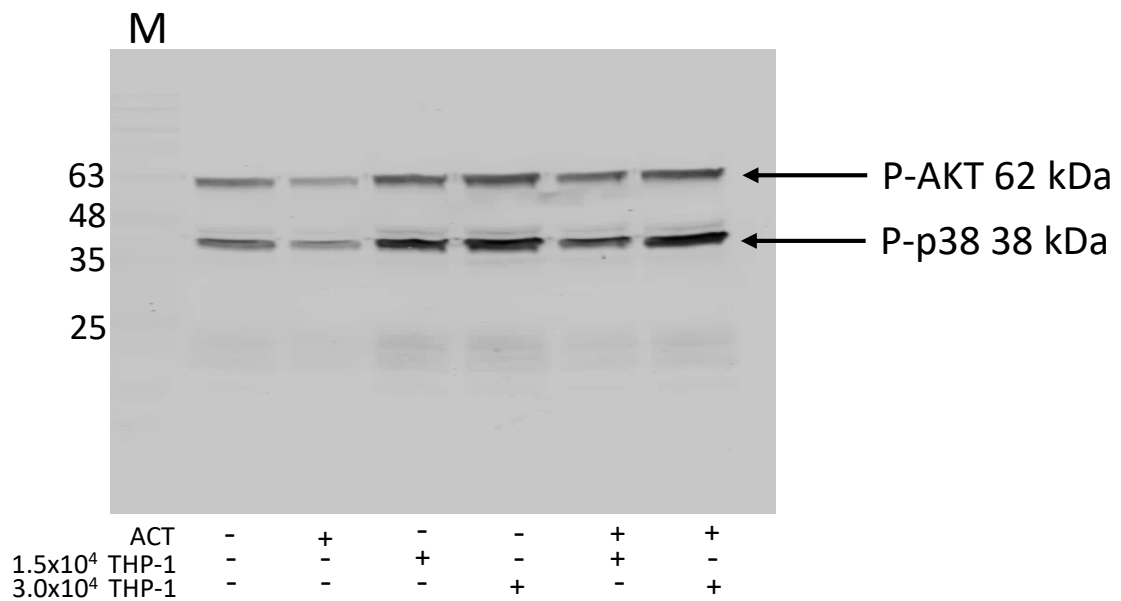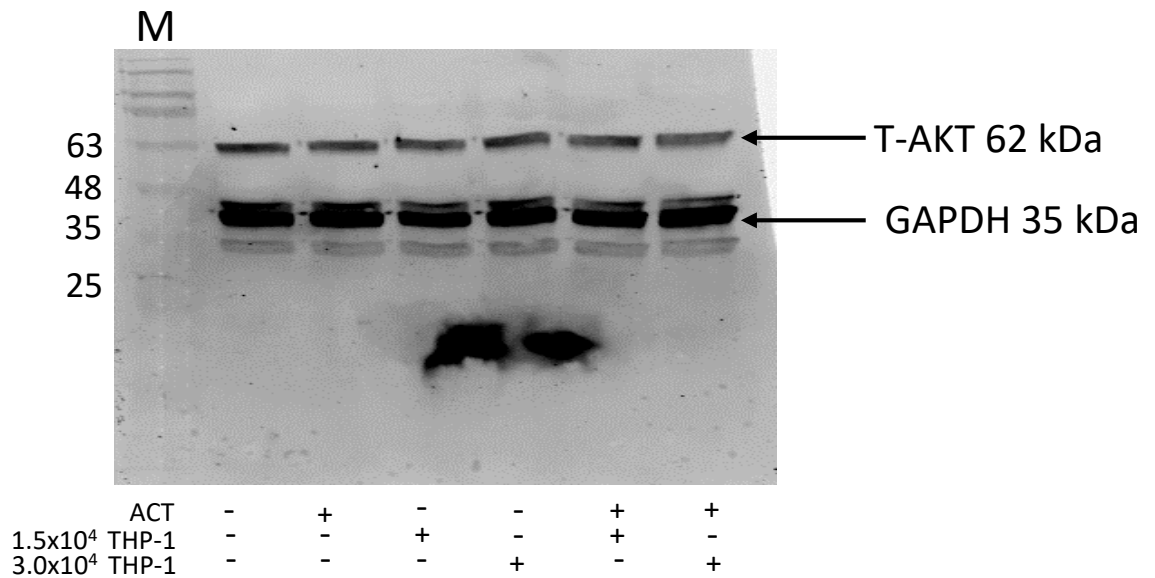

## GL261 + THP-1 conditioned medium: ERK1/2

M

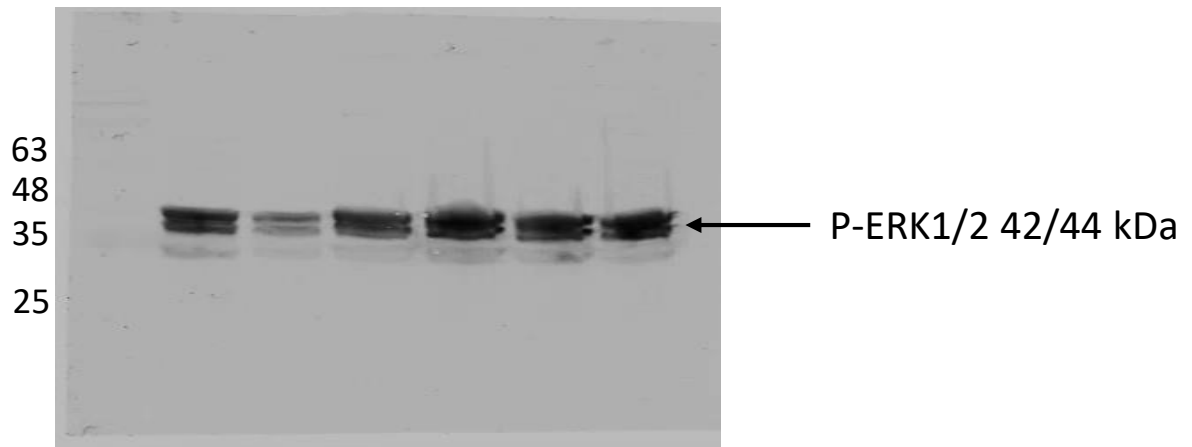

|                           |   |   |   |   |   |   |
|---------------------------|---|---|---|---|---|---|
| ACT                       | - | + | - | - | + | + |
| 1.5x10 <sup>4</sup> THP-1 | - | - | + | - | + | - |
| 3.0x10 <sup>4</sup> THP-1 | - | - | - | + | - | + |

M

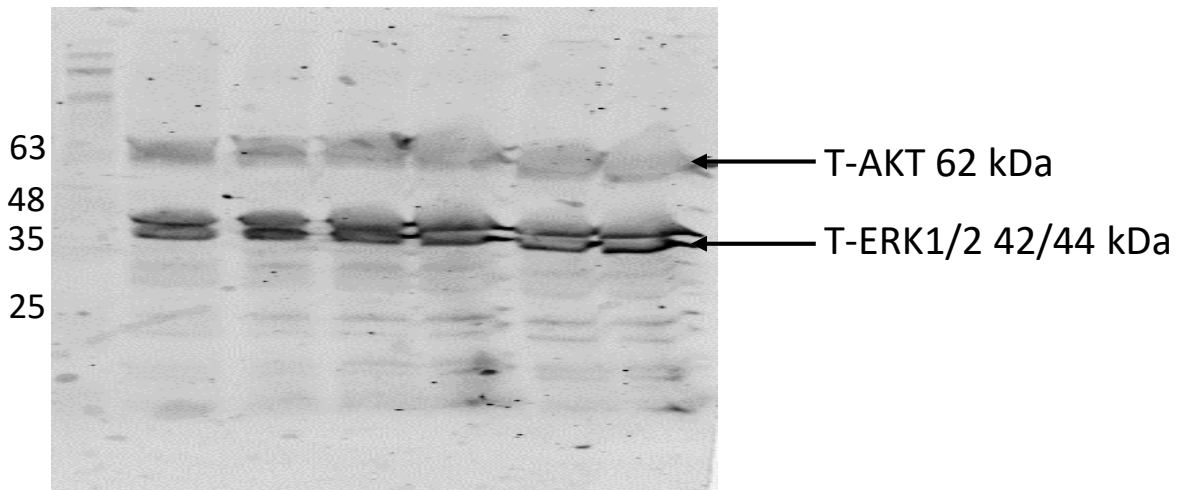

|                           |   |   |   |   |   |   |
|---------------------------|---|---|---|---|---|---|
| ACT                       | - | + | - | - | + | + |
| 1.5x10 <sup>4</sup> THP-1 | - | - | + | - | + | - |
| 3.0x10 <sup>4</sup> THP-1 | - | - | - | + | - | + |
